# Supplementary material
Source: ML conference proceedings conference paper supplement (https://proceedings.neurips.cc/paper_files/paper/2015/hash/1068c6e4c8051cfd4e9ea8072e3189e2-Abstract.html)
Supplement: Supplementary file 1 [file 1068c6e4c8051cfd4e9ea8072e3189e2-Supplemental.zip]

---

# Attention-Based Models for Speech Recognition

## Supplementary Material

---

**Jan Chorowski**  
University of Wrocław, Poland  
jan.chorowski@ii.uni.wroc.pl

**Dzmitry Bahdanau**  
Jacobs University Bremen, Germany

**Dmitriy Serdyuk**  
Université de Montréal

**Kyunghyun Cho**  
Université de Montréal

**Yoshua Bengio**  
Université de Montréal  
CIFAR Senior Fellow

## 1 Additional Figures

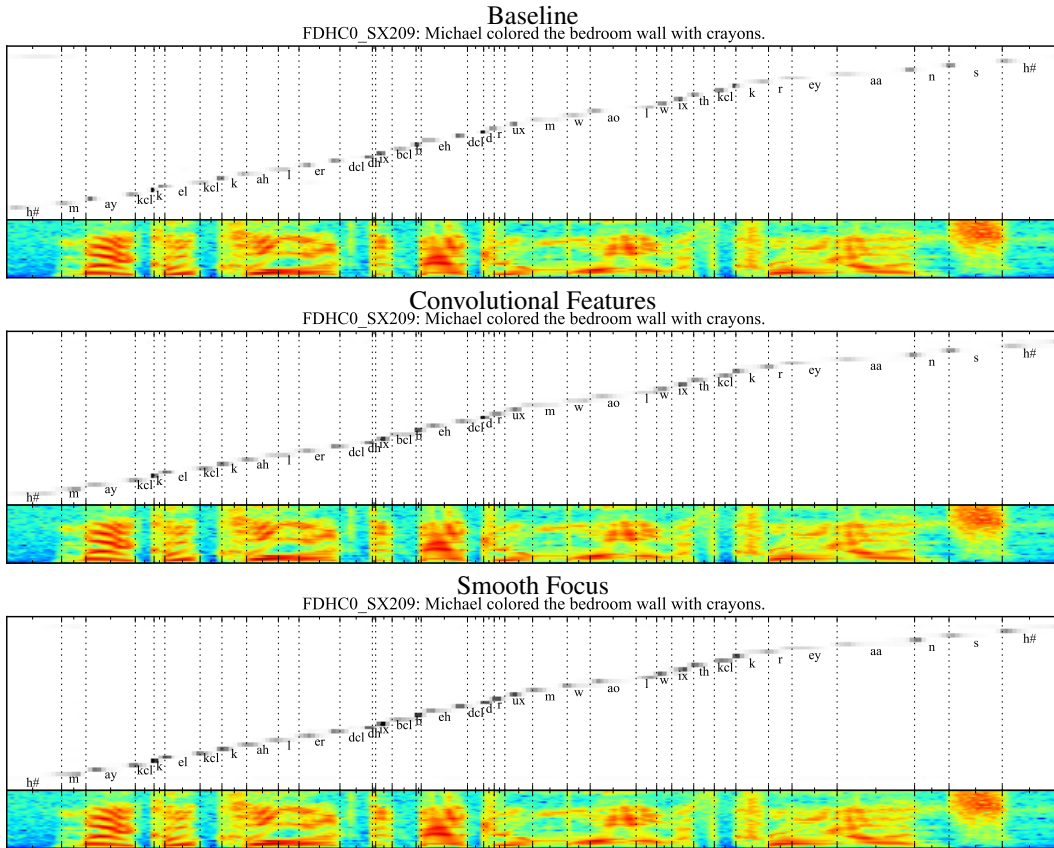

Figure 1: Alignments produced by evaluated models on the FDHC0\_SX209 test utterance. The vertical bars indicate ground truth phone location from TIMIT. Each row of the upper image indicates frames selected by the attention mechanism to emit a phone symbol. Compare with Figure 3. in the main text.

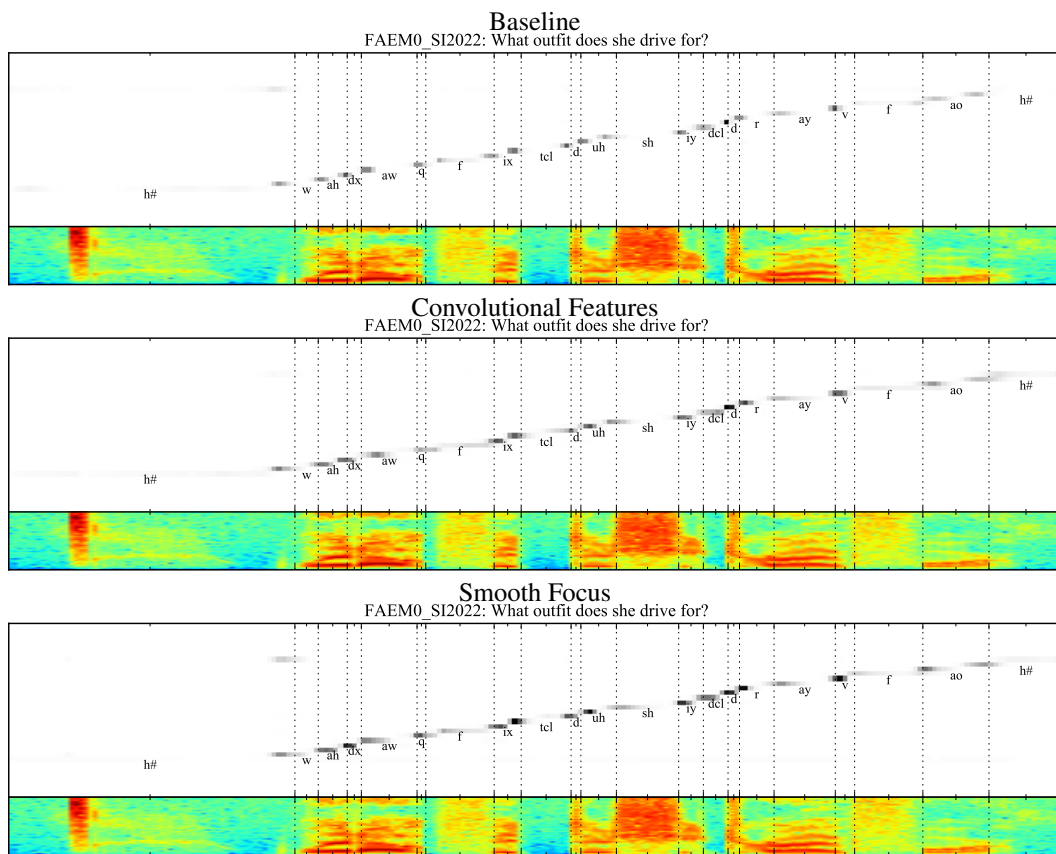

Figure 2: Alignments produced by evaluated models on the FAEM0\_SI2022 train utterance. The vertical bars indicate ground truth phone location from TIMIT. Each row of the upper image indicates frames selected by the attention mechanism to emit a phone symbol. Compare with Figure 3. in the main text.

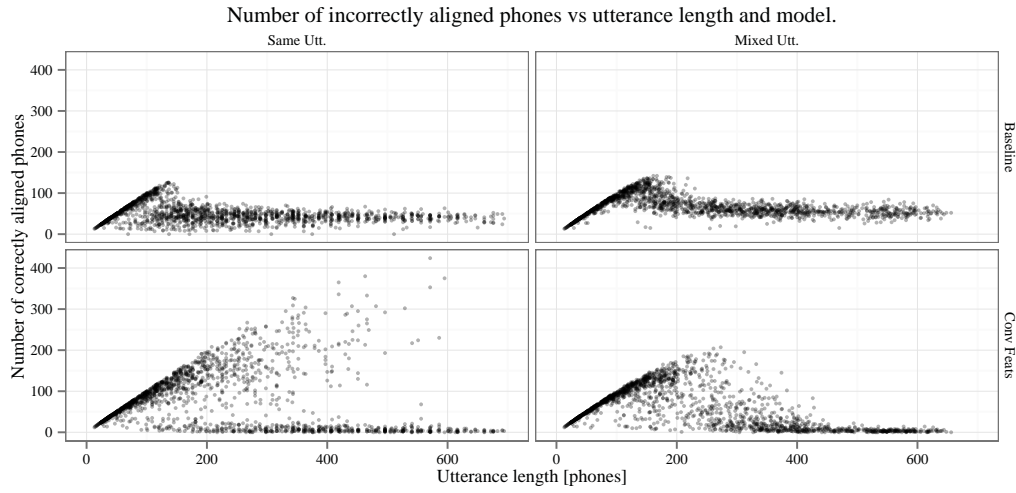

Figure 3: Close-up on the two failure modes of ARSG. Results of force-aligning concatenated TIMIT utterances. Each dot represents a single utterance. The left panels show results for concatenations of the same utterance. The right panels show results for concatenations of randomly chosen utterances. We compare the baseline network having a content-based only attention mechanism (top row) with a hybrid attention mechanism that uses convolutional features (bottom row). While neither model is able to properly align long sequences, they fail in different ways: the baseline network always aligns about 50 phones, while the location-aware network fails to align any phone. Compare with Figure 4 from the main paper.

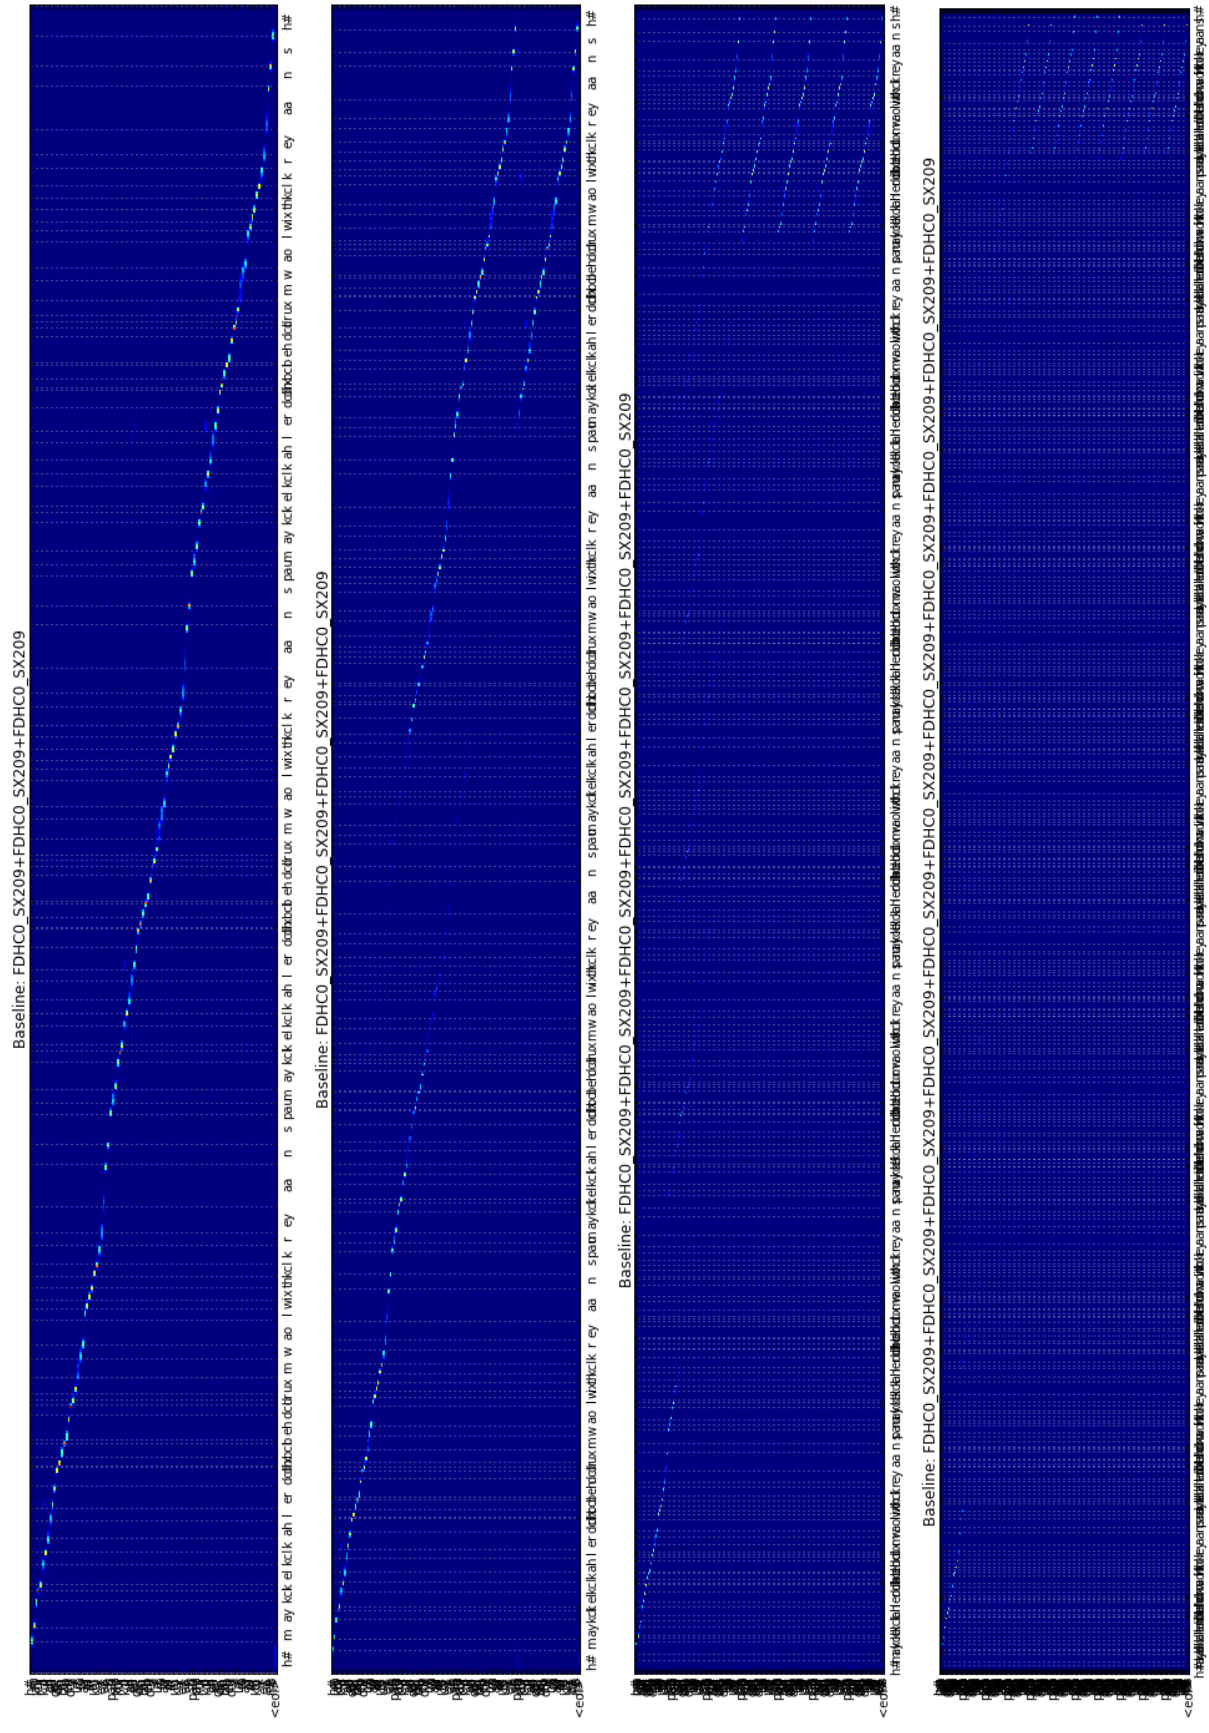

Figure 4: The baseline network fails to align more than 3 repetitions of FDHC0\_SX209.

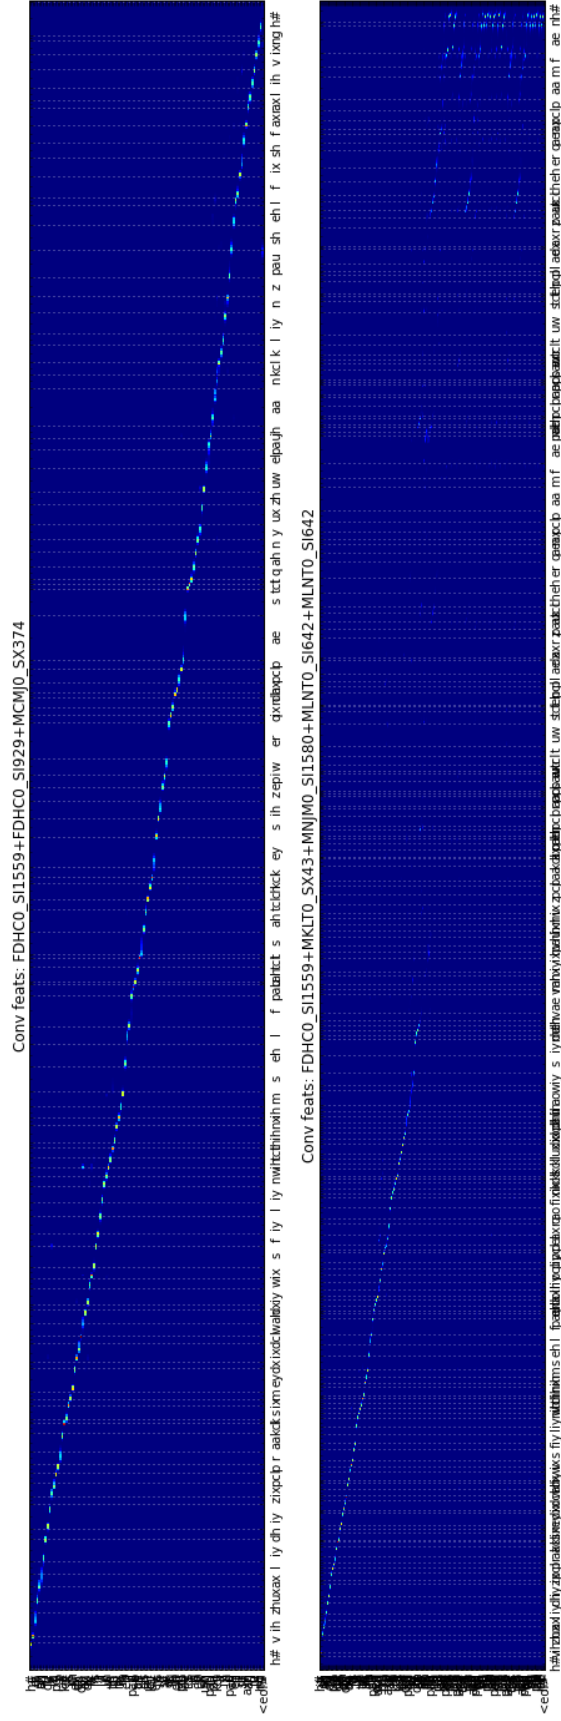

Figure 5: The baseline network aligns a concatenation of 3 different utterances, but fails to align 5.

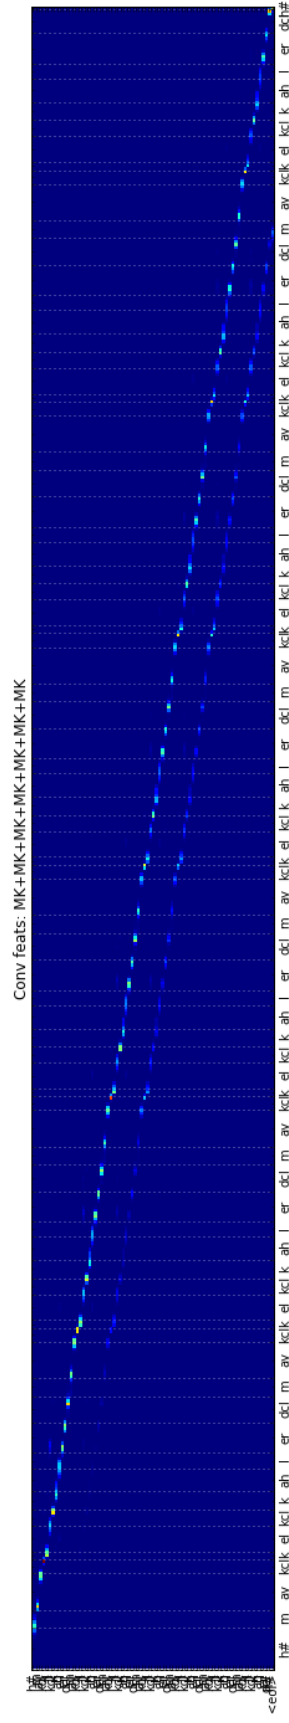

Figure 6: Forced alignment of the phrase “Michael colored” performed with the baseline model with windowing enabled (the alignment was constrained to  $\pm 75$  frames from the expected position of the generator at the last step. The window is wider than the pattern and the net confuses similar content. Strangely, the first two repetitions are aligned without any confusion with subsequent ones – the network starts to confound phoneme location only starting from the third repetition (as seen by the parallel strand of alignment which starts when the network starts to emit the phrase for the third time).



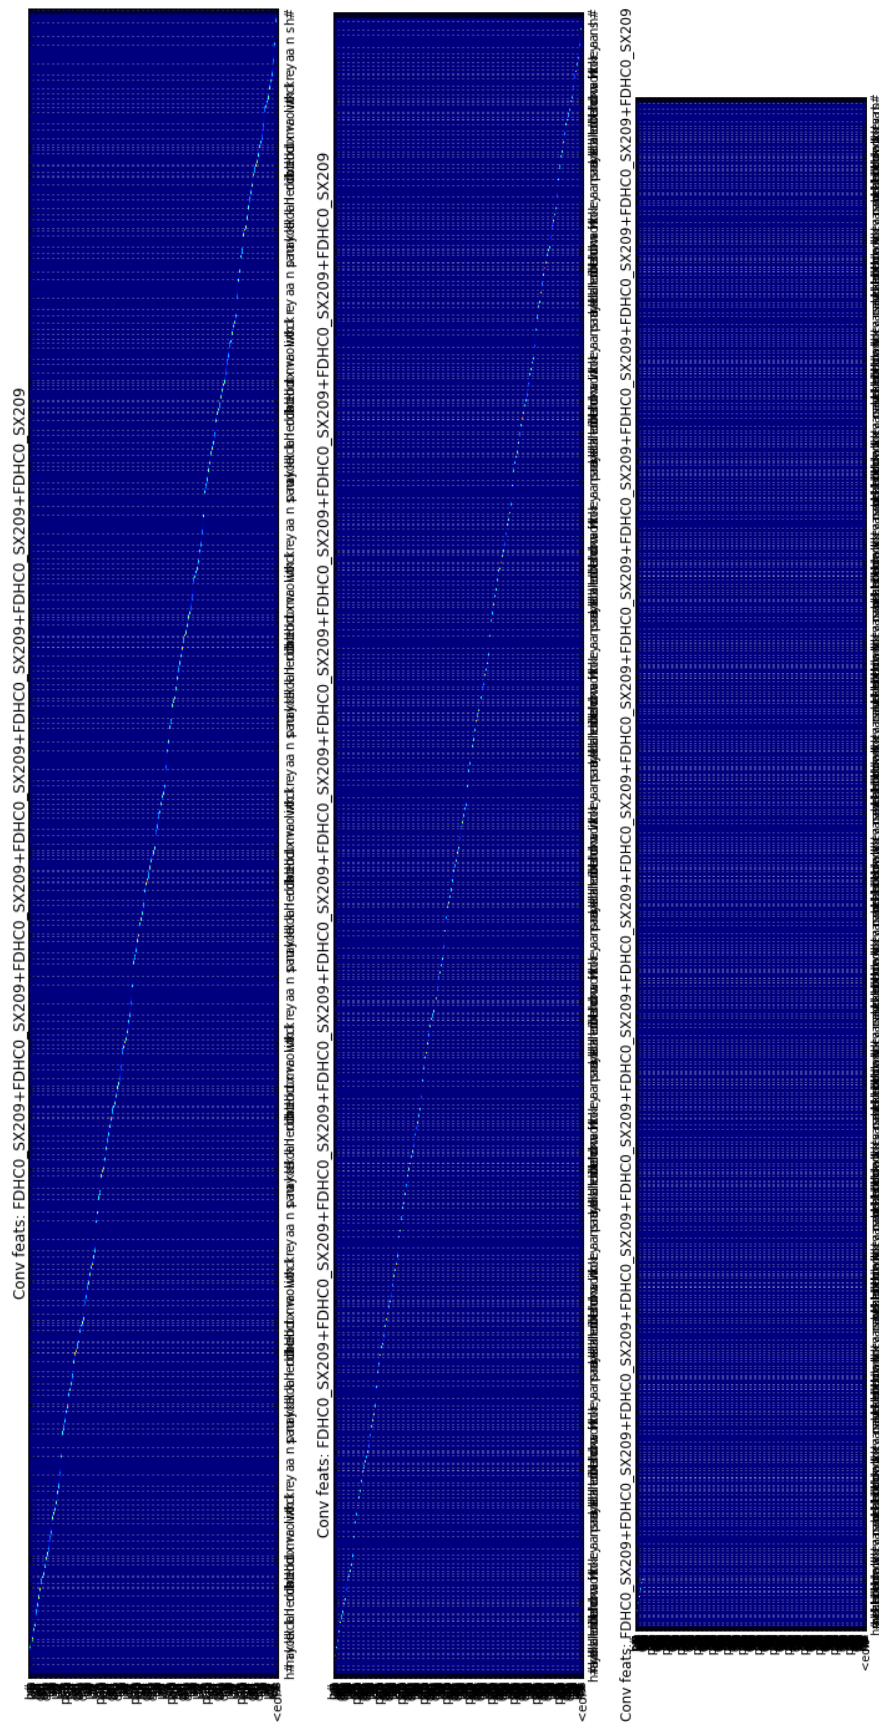

Figure 7: The location-aware network correctly aligns 7 and 11 repetitions of FDHC0\_SX209, but fails to align 15 repetitions of FDHC0\_SX209.

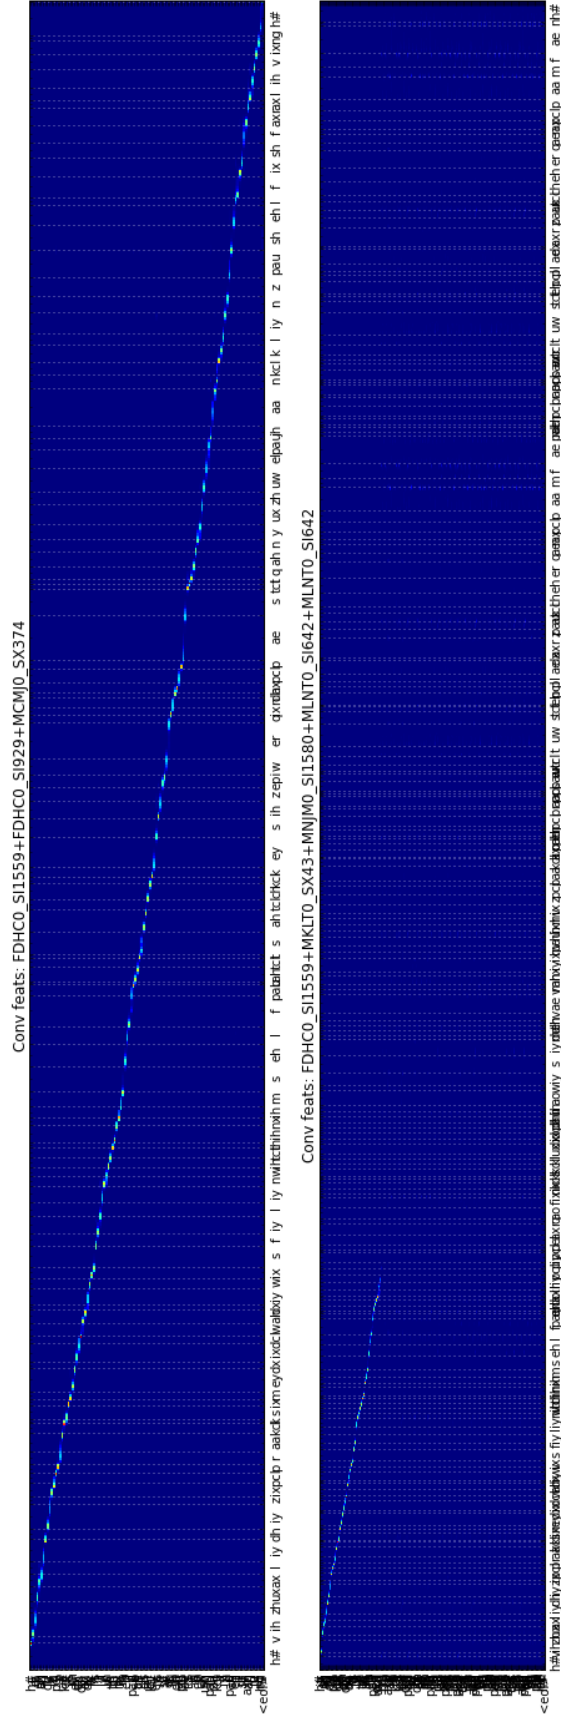

Figure 8: The location-aware network aligns a concatenation of 3 different utterances, but fails to align 5.



## 2 Detailed results of experiments

Table 1: Phoneme error rates while decoding with various modifications. Compare with Figure 5 from the main paper.

|              |      | Plain | Keep 1 | Keep 10 | Keep 50 | $\beta = 2$ | Win. $\pm 75$ | Win. $\pm 150$ |
|--------------|------|-------|--------|---------|---------|-------------|---------------|----------------|
| Baseline     | dev  | 15.9% | 17.6%  | 15.9%   | 15.9%   | 16.1%       | 15.9%         | 15.9%          |
|              | test | 18.7% | 20.2%  | 18.7%   | 18.7%   | 18.9%       | 18.7%         | 18.6%          |
| Conv Feats   | dev  | 16.1% | 19.4%  | 16.2%   | 16.1%   | 16.7%       | 16.0%         | 16.1%          |
|              | test | 18.0% | 22.3%  | 17.9%   | 18.0%   | 18.7%       | 18.0%         | 18.0%          |
| Smooth Focus | dev  | 15.8% | 21.6%  | 16.5%   | 16.1%   | 16.2%       | 16.2%         | 16.0%          |
|              | test | 17.6% | 24.7%  | 18.7%   | 17.8%   | 18.4%       | 17.7%         | 17.6%          |
